# Supplementary material for: Strengths and Limitations of 16S rRNA Gene Amplicon Sequencing in Revealing Temporal Microbial Community Dynamics
Source: PubMed Central journal article supplement (PMC3979728; doi:10.1371/journal.pone.0093827), 2014-04-08
Supplement: pone.0093827.s001.pdf [file pone.0093827.s001.pdf]

**TABLE S1. Characteristics of Lake Lanier at Brown's Bridge for several dates in 2009.**

| Date                     | Temp (°C) | pH   | Turbidity (NTU) | Dissolved solids (g/L) | Conductivity (µS/cm) | Dissolved O <sub>2</sub> (mg/L) | NH <sub>4</sub> (mg/L) | NO <sub>2</sub> +NO <sub>3</sub> (mg/L) | Total N (mg/L) | Total P (mg/L) | Chl a (µg/L) | Total Organic Carbon (mg/L) |
|--------------------------|-----------|------|-----------------|------------------------|----------------------|---------------------------------|------------------------|-----------------------------------------|----------------|----------------|--------------|-----------------------------|
| 20-Aug-2009 <sup>b</sup> | 28.9      | 7.86 | -               | -                      | 49.4                 | 7.57                            | 0.03                   | 0.04                                    | 0.28           | 0.03           | 5.28         | <1.0                        |
| 26-Aug-2009 <sup>a</sup> | 28.5      | 7.61 | 222             | 0.03                   | 50                   | 7.9                             | -                      | -                                       | -              | -              | -            | -                           |
| 28-Aug-2009 <sup>a</sup> | 28.5      | 7.71 | 230             | 0.03                   | 50                   | 7.8                             | -                      | -                                       | -              | -              | -            | -                           |
| 7-Sep-2009 <sup>a</sup>  | -         | -    | -               | -                      | -                    | -                               | -                      | -                                       | -              | -              | -            | -                           |
| 23-Sep-2009 <sup>b</sup> | 24.1      | 6.75 | -               | -                      | 44                   | 7.1                             | 0.03                   | 0.02                                    | 0.22           | 0.04           | 5.88         | 1.8                         |
| 8-Nov-2009 <sup>a</sup>  | 19.2      | 6.78 | 3.2             | 0.03                   | 46                   | 7.3                             | -                      | -                                       | -              | -              | -            | -                           |
| 14-Nov-2009 <sup>b</sup> | 17        | 7.28 | 1.7             | -                      | 41                   | 9.3                             | 0.01                   | 0.10                                    | 0.72           | 0.04           | 7.68         | 2.1                         |

<sup>a</sup> Samples corresponding to the 16S rRNA amplicon and shotgun metagenome sequencing datasets

<sup>b</sup> Data obtained from the Georgia Department of Natural Resources

**Table S2. V1-V3 specific primers used for amplification of the 16S rRNA gene.** Lowercase indicates the adaptor sequence and bold indicates the sample-specific barcode (multiplex identifier; MID).

| Primer | Sample | Sequence                                                             |
|--------|--------|----------------------------------------------------------------------|
| 27F    | All    | 5'-cctatcccctgtgtgccttggcagtctcagAGAGTTTGATCCTGGCTCAG-3'             |
| 534R   | AUG1-A | 5'-ccatctcatccctgctgtctccgactcag <b>AGACAC</b> ATTACCGCGGCTGCTGG-3'  |
|        | AUG1-B | 5'-ccatctcatccctgctgtctccgactcag <b>CGACTC</b> ATTACCGCGGCTGCTGG-3'  |
|        | AUG2   | 5'-ccatctcatccctgctgtctccgactcag <b>ACTCAC</b> ATTACCGCGGCTGCTGG-3'  |
|        | SEPT   | 5'-ccatctcatccctgctgtctccgactcag <b>ACGCGC</b> ATTACCGCGGCTGCTGG-3'  |
|        | NOV-A  | 5'-ccatctcatccctgctgtctccgactcag <b>CCTCTC</b> ATTACCGCGGCTGCTGG-3'  |
|        | NOV-B  | 5'-ccatctcatccctgctgtctccgactcag <b>AGCTTC</b> ATTACCGCGGCTGCTGG-3'  |
|        | NOV-C  | 5'-ccatctcatccctgctgtctccgactcag <b>AAGCCGC</b> ATTACCGCGGCTGCTGG-3' |

**TABLE S3. 16S rRNA gene amplicon library statistics.**

---

| Sample          | Date        | No.       | No.       |
|-----------------|-------------|-----------|-----------|
|                 |             | sequences | sequences |
|                 |             | Lane 1    | Lane 2    |
| AUG1 A          | 26 Aug 2009 | 38,582    | 38,974    |
| AUG1 B          | 26 Aug 2009 | 34,183    | 34,908    |
| AUG_2           | 28 Aug 2009 | 44,405    | 44,417    |
| SEPT            | 07 Sep 2009 | 34,004    | 34,439    |
| NOV A           | 08 Nov 2009 | 38,361    | 39,486    |
| NOV B           | 08 Nov 2009 | 58,427    | 60,847    |
| NOV C           | 08 Nov 2009 | 29,288    | 30,094    |
| Control mixture | ----        | 13,591    | 12,701    |

---

**TABLE S4. Metagenome library statistics.** The individual metagenomes were described previously (1)

| Sample    | Date        | No. of reads | Avg read length (bp) | Total no. contigs | Total length of contigs (Mb) |
|-----------|-------------|--------------|----------------------|-------------------|------------------------------|
| AUG_1     | 26 Aug 2009 | 23,820,047   | 100                  | 168,215           | 93.08                        |
| AUG_2     | 28 Aug 2009 | 23,501,825   | 100                  | 320,279           | 143.12                       |
| SEPT      | 07 Sep 2009 | 21,591,982   | 100                  | 270,874           | 120.39                       |
| NOV       | 08 Nov 2009 | 24,579,678   | 100                  | 380,549           | 130.87                       |
| Consensus | --          | --           | 100                  | 217,149           | 269.34                       |

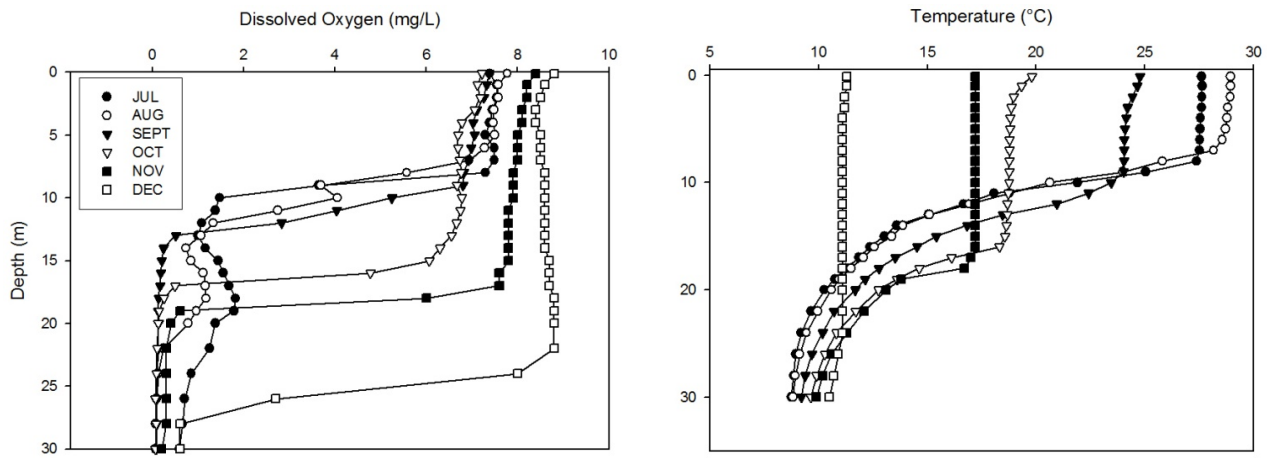

**Figure S1. Dissolved oxygen (left) and temperature (right) profiles for July-December 2009 at the Brown's Bridge location of Lake Lanier.** Lake Lanier stratifies during the early spring and summer and is strongly stratified in the summer. It begins mixing in the late fall/early winter and becomes well mixed in the winter. Samples for 16S rRNA and metagenomic characterization were collected at a depth of 5 m, within the epilimnion. Lake Lanier profile data was obtained from the Georgia Department of Natural Resources from a single sampling day in each month.

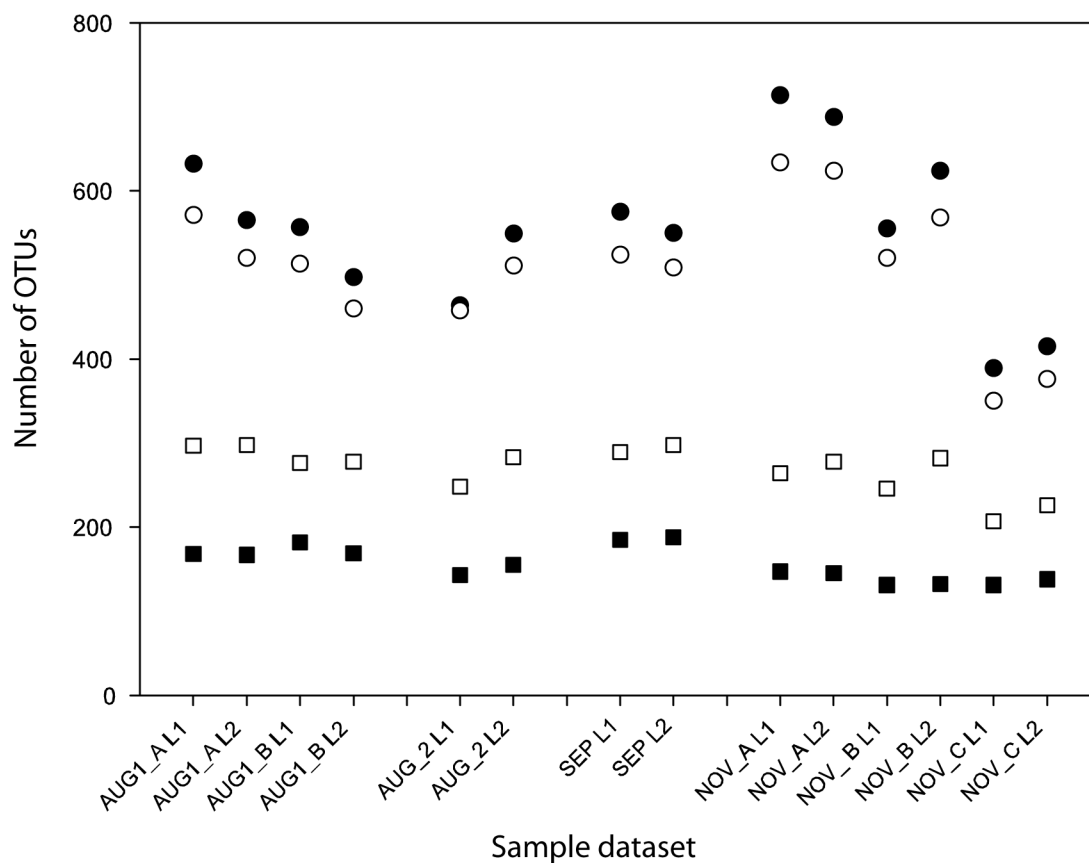

**Figure S2. Number of OTUs identified in each dataset.** OTUs identified by binning 16S rRNA amplicon sequences at the 97% (white) and 99% (black) levels after subsampling each dataset to the same depth (circles) and after filtering out singletons (squares). L1 and L2 in the name of each dataset indicate the independent sequencing replicates of the same DNA pool.

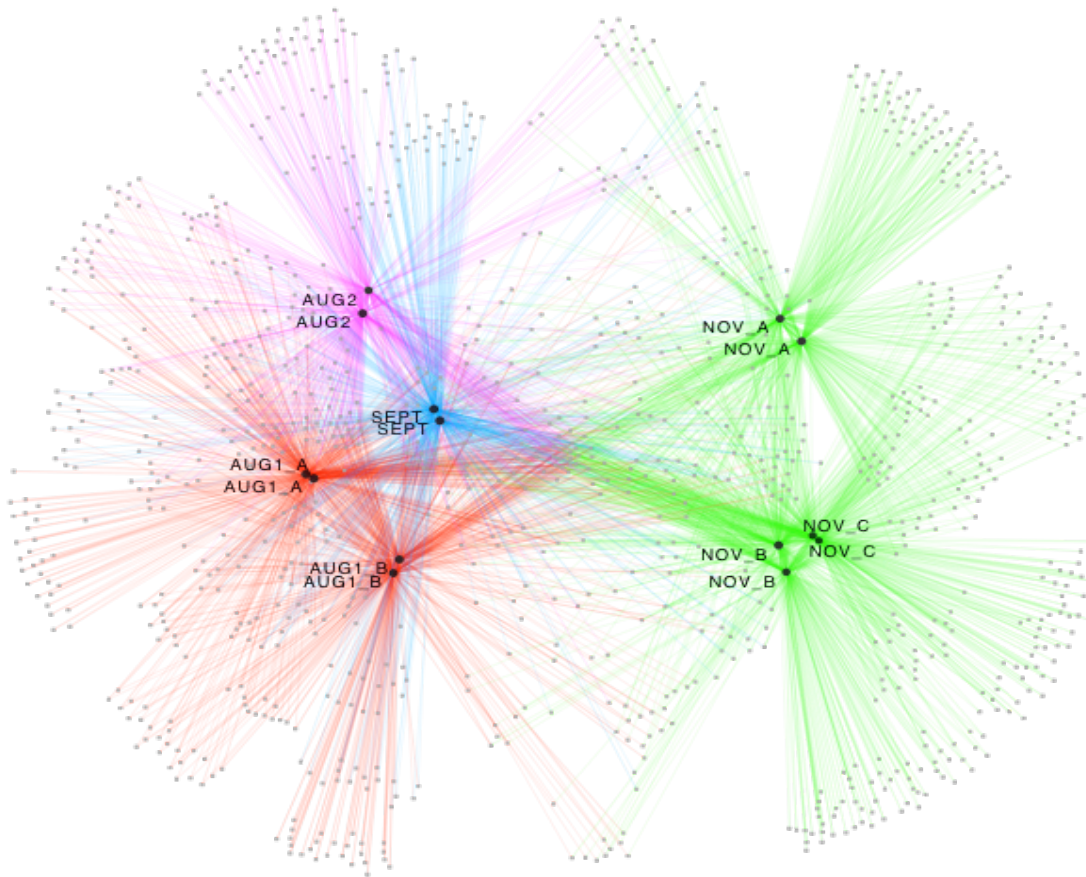

**Figure S3: Similarity of datasets based on shared OTUs.** The network shows the datasets clustered based on shared OTUs and the number of reads comprising each OTU. Datasets are indicated by a black circle and the connections are color coded by timepoint (Red= AUG1, Pink= AUG2, Blue= SEPT, and Green= NOV). OTUs are represented by grey squares. Duplicate sample runs were significantly connected to each other (G-test,  $p < 0.01$ ).

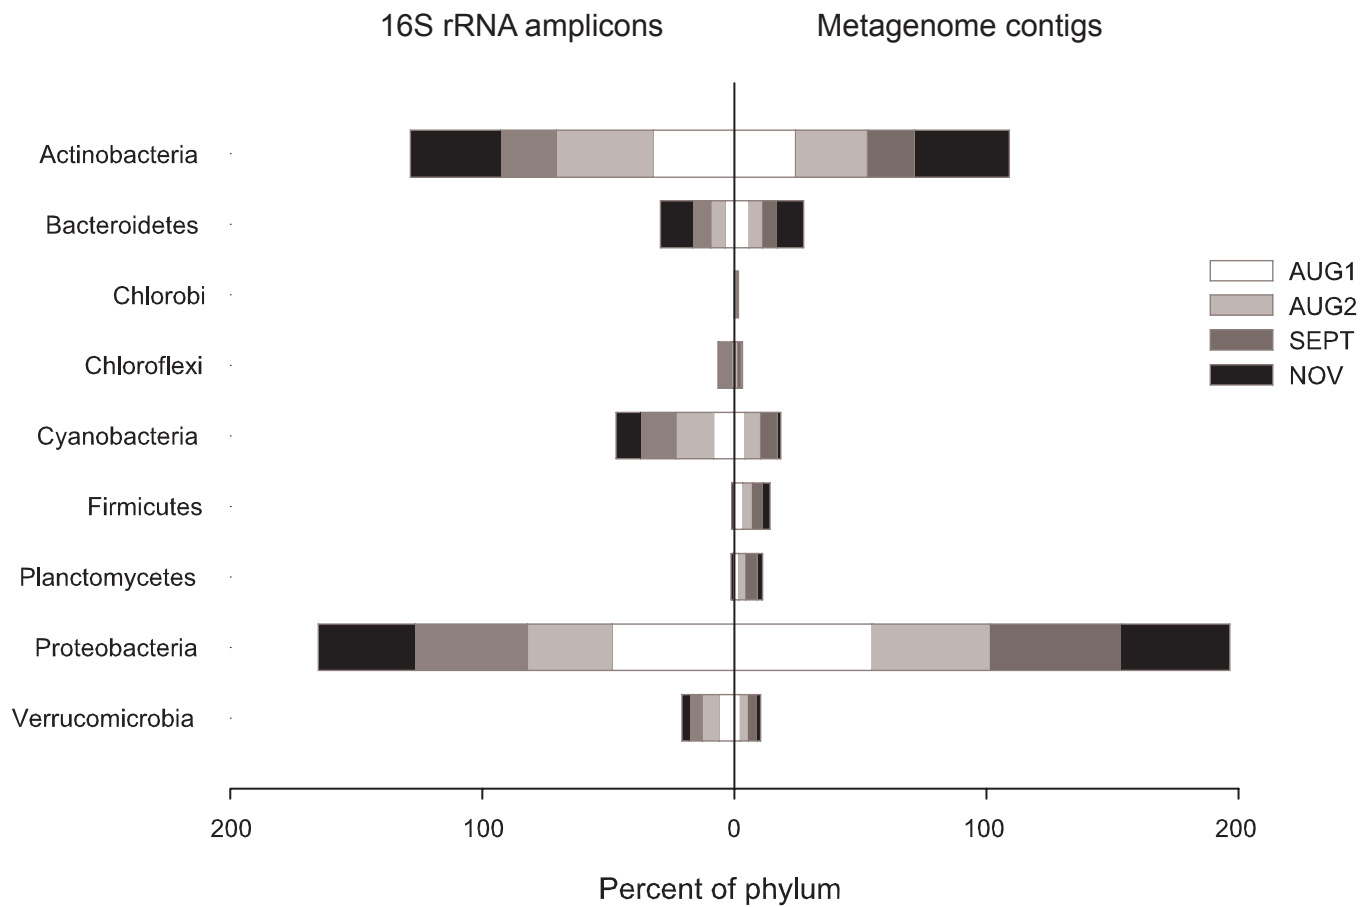

**Figure S4. Differences in phylum abundance based on 16S and metagenomes.** Phylum-level taxonomic affiliation (based on NCBI taxonomy) of the 16S rRNA gene amplicon sequences datasets (left) and metagenomic contigs (right) from the four timepoints (AUG1, white; AUG2, light grey; SEPT, dark grey; NOV, black).



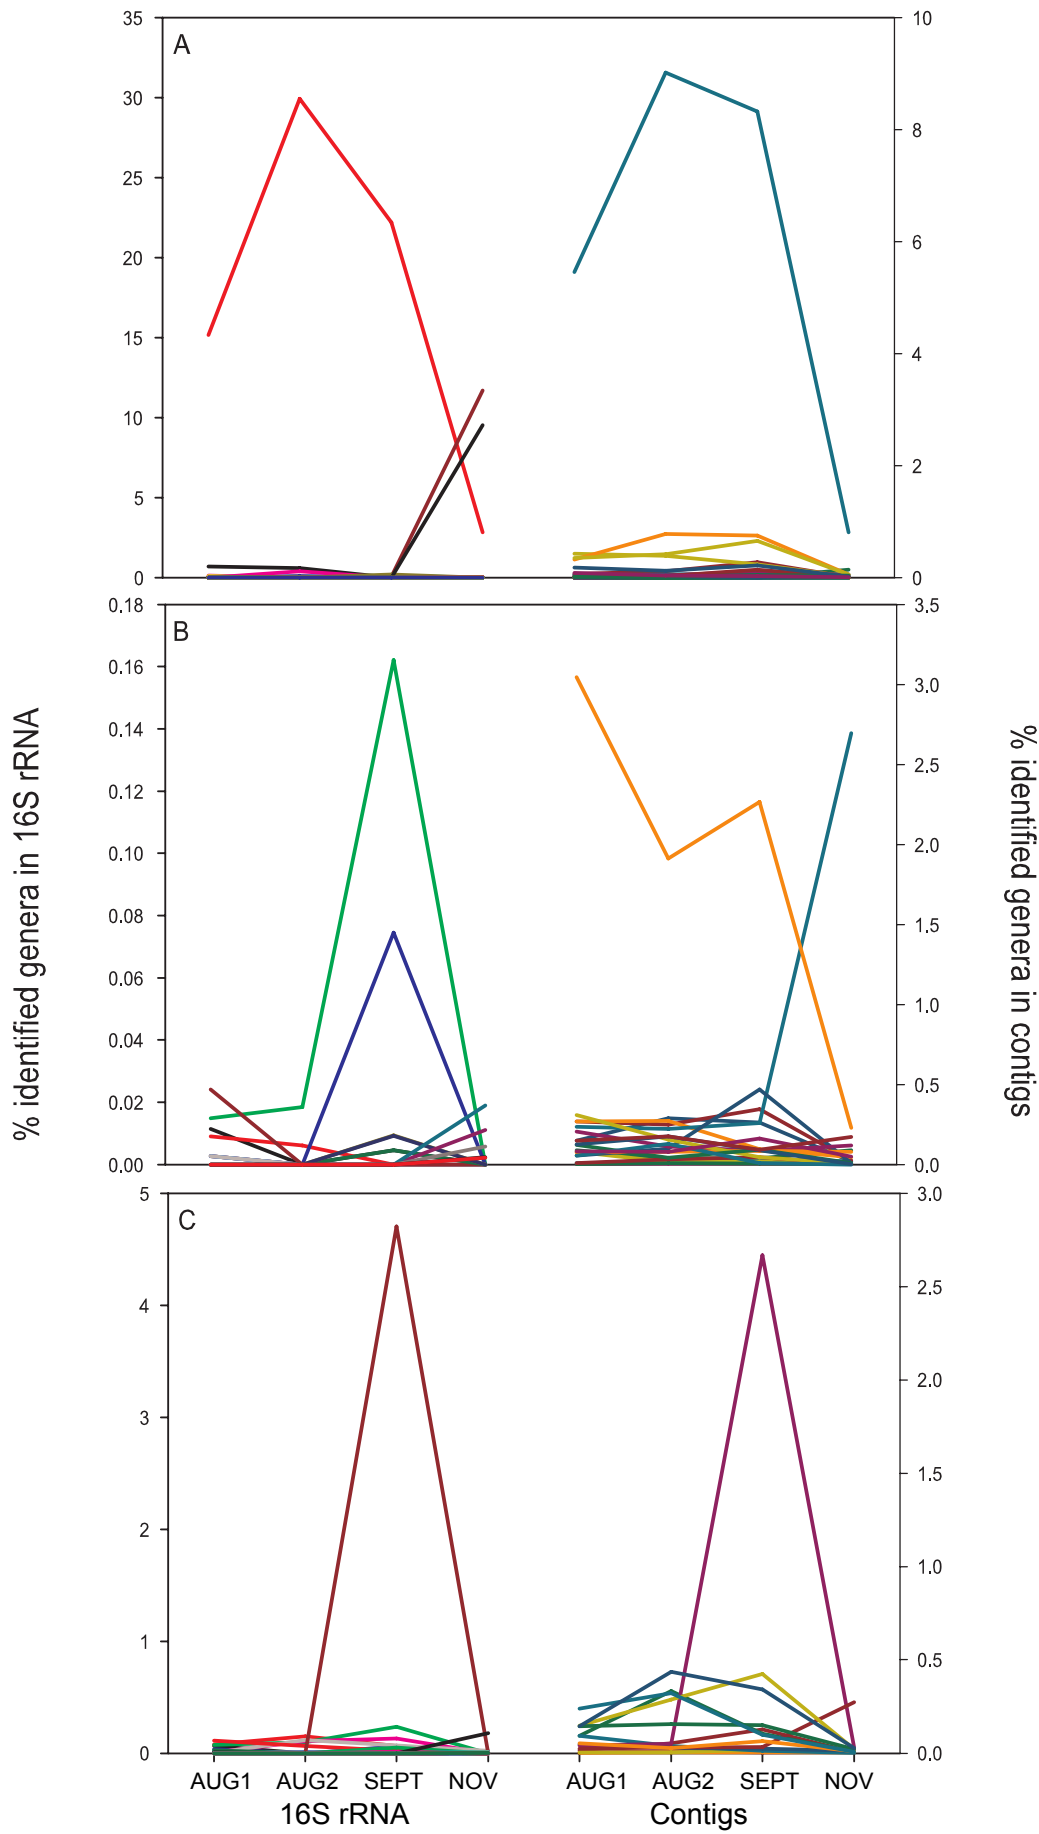

**Figure S5. Differences in abundance of individual genera based on 16S and metagenomes.**  
The graph shows the abundance of all individual OTUs (16S data; left) or genomic populations (metagenomics data; right) attributed to *Synechococcus* (A), *Burkholderia* (B), and *Legionella* (C) genera.

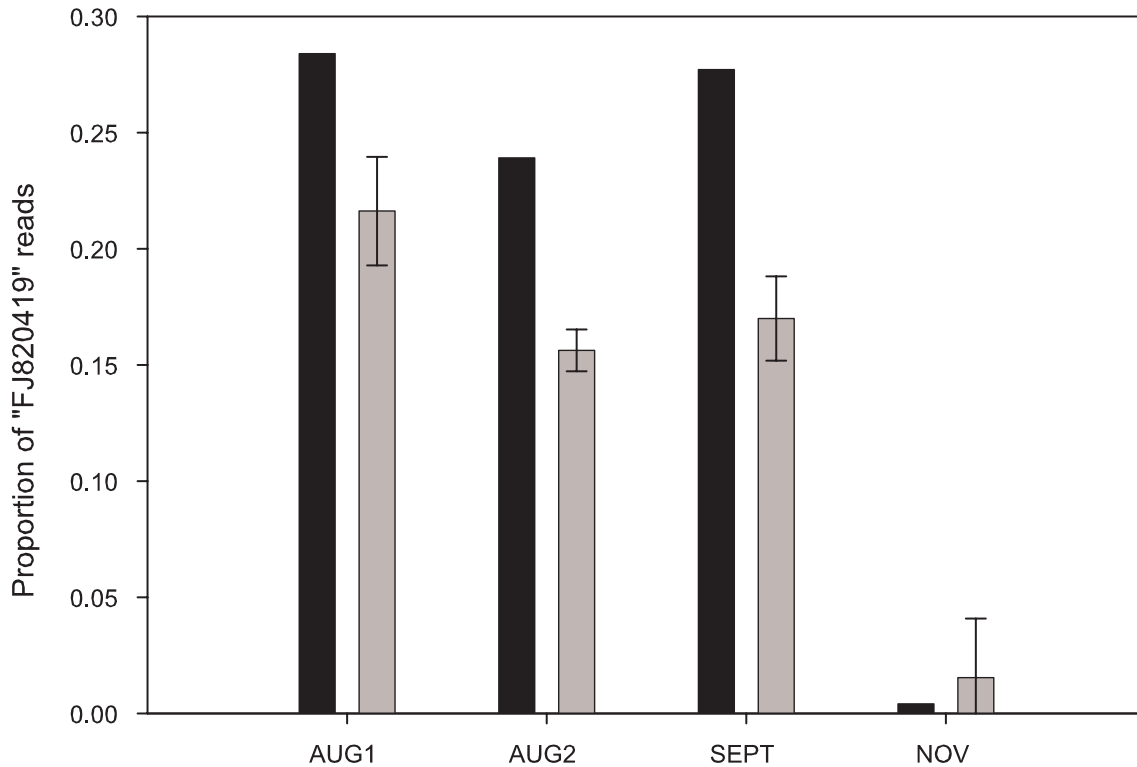

**Figure S6. Abundance of an individual *Burkholderia*-like population based on 16S amplicon vs. 16S metagenomic reads.** Bars represent the proportion of 16S rRNA gene reads in either the metagenomic datasets (black) or the 16S rDNA amplicon datasets (gray) that matched a full-length 16S rRNA gene sequence ("FJ820419") reconstructed from the metagenomic data using EMIRGE (2). The 16S amplicon error bars represent one standard deviation from the mean based on the replicate amplicon datasets.

## References

1. **Oh S, Caro-Quintero A, Tsementzi D, Deleon-Rodriguez N, Luo C, Poretsky R, Konstantinidis KT.** 2011. Metagenomic insights into the evolution, function, and complexity of the planktonic microbial community of lake lanier, a temperate freshwater ecosystem. *Appl. Environ. Microbiol.* **77**:6000-6011.
2. **Miller CS, Baker BJ, Thomas BC, Singer SW, Banfield JF.** 2011. EMIRGE: reconstruction of full-length ribosomal genes from microbial community short read sequencing data. *Genome Biol* **12**:R44.
